# Supplementary material for: A snapshot of gut microbiota of an adult urban population from Western region of India
Source: PubMed Central journal article supplement (PMC5889170; doi:10.1371/journal.pone.0195643), 2018-04-06
Supplement: pone.0195643.s009.pdf [file pone.0195643.s009.pdf]

**S3 Table:** Details of various studies (and corresponding number of samples) that were used for comparative analysis with Indian microbiome samples obtained in the present study

| <b>Study Tag</b> | <b>Number of Samples</b> | <b>16S Variable region</b> | <b>Reference</b>                 |
|------------------|--------------------------|----------------------------|----------------------------------|
| Japan_16         | 16*                      | V1-V2                      | Kato <i>et al.</i> , 2013        |
| Japan_18         | 18*                      | V1-V2                      | Kim <i>et al.</i> , 2014         |
| China            | 81*                      | V3                         | Xiao <i>et al.</i> , 2013        |
| USA              | 80\$                     | V1-V3 & V3-V5              | Turnbaugh <i>et al.</i> , 2007   |
| Finland          | 54^                      | V1-V3                      | Scheperjans <i>et al.</i> , 2015 |
| India_18         | 18#                      | V3                         | Bhute <i>et al.</i> , 2016       |
| Present Study    | 160                      | V3-V4                      | -                                |

\* Only those samples which were taken from healthy subjects (prior to administration of any form of pre/probiotics) were considered

\$ In all studies (including this one), only those samples were considered that had a minimum of 1000 assigned sequences

^ In this study, only those samples which were taken from healthy (control) subjects were considered for analysis

# 18 samples whose metadata clearly indicated the subjects as 'healthy' were only considered.
