# Supplementary material for: A snapshot of gut microbiota of an adult urban population from Western region of India
Source: PubMed Central journal article supplement (PMC5889170; doi:10.1371/journal.pone.0195643), 2018-04-06
Supplement: pone.0195643.s010.pdf [file pone.0195643.s010.pdf]

**S4 Table:** List of differentially abundant pathways (identified between Cluster-1a, Cluster-1b and Cluster-2). Significantly different pathways were identified using Kruskal-Wallis rank sum test (with Benjamini-Hochberg corrected p-values < 0.001 at a False Discovery Rate of 0.0001) coupled with a bootstrap approach. Pathways with significantly different median abundances in at least 99% of iterations are shown in this table. For ease of readers, the corresponding pathway classes are also indicated. The last column titled ‘Vikodak Pathway Exclusion Cut-off (PEC) threshold’ indicates the PEC value thresholds at which the pathway was reported by Vikodak. Green indicates presence and red indicates absence.

| Pathway Class                        | Pathways that significantly differentiate between the three clusters | Median Pathway Abundance (at PEC 70) |            |           | Vikodak Pathway Exclusion Cut-off (PEC) threshold |   |   |   |   |
|--------------------------------------|----------------------------------------------------------------------|--------------------------------------|------------|-----------|---------------------------------------------------|---|---|---|---|
|                                      |                                                                      | Cluster 1a                           | Cluster 1b | Cluster 2 | 5                                                 | 6 | 7 | 8 | 9 |
| Membrane transport                   | Phosphotransferase system PTS                                        | 1227                                 | 1147       | 742       | 0                                                 | 0 | 0 | 0 | 0 |
| Carbohydrate metabolism              | Glycolysis or Gluconeogenesis                                        | 40270                                | 49509      | 29060     | 0                                                 | 0 | 0 | 0 | 0 |
| Nucleotide metabolism                | Pyrimidine metabolism                                                | 37800                                | 46761      | 32265     | 0                                                 | 0 | 0 | 0 | 0 |
| Amino acid metabolism                | Alanine aspartate and glutamate                                      | 28782                                | 34174      | 18836     | 0                                                 | 0 | 0 | 0 | 0 |
| Carbohydrate                         | Pyruvate                                                             | 20237                                | 24359      | 14641     | 0                                                 | 0 | 0 | 0 | 0 |
| Energy metabolism                    | Carbon fixation pathways in prokaryotes                              | 19114                                | 23560      | 13591     | 0                                                 | 0 | 0 | 0 | 0 |
| Carbohydrate                         | Butanoate                                                            | 18008                                | 21509      | 11308     | 0                                                 | 0 | 0 | 0 | 0 |
| Translation                          | Aminoacyl tRNA                                                       | 16815                                | 19736      | 15286     | 0                                                 | 0 | 0 | 0 | 0 |
| Energy metabolism                    | Carbon fixation in photosynthetic organisms                          | 15203                                | 19199      | 10202     | 0                                                 | 0 | 0 | 0 | 0 |
| Metabolism of cofactors and vitamins | Pantothenate and CoA biosynthesis                                    | 14256                                | 18111      | 11505     | 0                                                 | 0 | 0 | 0 | 0 |
| Carbohydrate metabolism              | Citrate cycle TCA cycle                                              | 13957                                | 17563      | 9960      | 0                                                 | 0 | 0 | 0 | 0 |
| Carbohydrate metabolism              | Pentose phosphate pathway                                            | 13436                                | 17101      | 9502      | 0                                                 | 0 | 0 | 0 | 0 |
